# Supplementary material
Source: PubMed Central journal article supplement (PMC7839379)
Supplement: advancesADV2020003005-suppl1.pdf [file advancesADV2020003005-suppl1.pdf]

**Supplemental Materials for**

**Impaired T and NK Cell Reconstitution after Haploidentical HCT with Post-transplant  
Cyclophosphamide**

Benedetta Rambaldi<sup>1,2</sup>, Haesook T. Kim<sup>3</sup>, Carol Reynolds<sup>1</sup>, Sharmila C. Rai<sup>1</sup>, Yohei Arihara<sup>1</sup>,  
Tomohiro Kubo<sup>°</sup>, Leutz Buon<sup>4</sup>, Mahasweta Goptu<sup>1</sup>, John Koreth<sup>1</sup>, Corey Cutler<sup>1</sup>, Sarah  
Nikiforow<sup>1</sup>, Vincent T. Ho<sup>1</sup>, Edwin P. Alyea<sup>1§</sup>, Joseph H. Antin<sup>1</sup>, Catherine J. Wu<sup>1</sup>, Robert J.  
Soiffer<sup>1</sup>, Jerome Ritz<sup>1\*</sup>, and Rizwan Romee<sup>1\*</sup>

<sup>1</sup>Department of Medical Oncology, Dana-Farber Cancer Institute and Harvard Medical School,  
Boston, MA

<sup>2</sup>Clinical and Experimental Sciences Department, Bone Marrow Transplant Unit, ASST Spedali  
Civili, University of Pavia, Brescia, Italy

<sup>3</sup>Department of Data Sciences, Dana-Farber Cancer Institute, Harvard T H Chan School of  
Public Health, Boston, MA

<sup>4</sup>Department of Bioinformatics & Data Science, Dana-Farber Cancer Institute, Harvard Medical  
School, Boston, MA

<sup>°</sup>Current affiliation: Department of Medical Oncology and Hematology, Sapporo Medical  
University School of Medicine, Sapporo, Japan

<sup>§</sup>Current affiliation: Duke Cancer Institute - Duke University, Durham, NC

**This file includes:**

Supplemental Table 1-11

Supplemental Figure 1-8

**Corresponding author:**

\*Jerome Ritz, MD

Email: [jerome\\_ritz@dfci.harvard.edu](mailto:jerome_ritz@dfci.harvard.edu)

**Co-corresponding author:**

\*Rizwan Romee

Email: [Rizwan\\_romee@dfci.harvard.edu](mailto:Rizwan_romee@dfci.harvard.edu)

## SUPPLEMENTAL METHODS

### **Patients, Transplantation Procedures and sample collection**

This study included 95 patients who underwent allogeneic HCT at the Dana-Farber Cancer Institute and Brigham and Woman's Hospital (Boston, MA) between November 2011 and November 2018. Of these, 60 patients received a haploidentical T cell replete haplo-HCT with PTCy (haplo-HCT group) and 35 underwent a matched (8/8) related (11/35) or unrelated (24/35) donor transplant (MD-HCT group). Both cohorts received reduced intensity conditioning (RIC): cyclophosphamide (29 mg/kg) and fludarabine (120 mg/m<sup>2</sup>) and low dose of total body irradiation (TBI, 200 cGy) for haplo-HCT group and intravenous low dose busulfan (260 mg/m<sup>2</sup> or 3.2 mg/Kg) and fludarabine (120 mg/m<sup>2</sup>) for MD-HCT group. GVHD prophylaxis for haplo-HCT patients consisted of PTCy (50 mg/kg on days +3 and +4) and tacrolimus (TAC) and mycophenolate mofetil (MMF) starting from day +5. MMF was discontinued at day +28. No systemic corticosteroids were allowed until 24 hours after completion of day +4 cyclophosphamide. GVHD prophylaxis for MD-HCT patients consisted of methotrexate (MTX, 5 mg/m<sup>2</sup>) on days +1, +3, +6, +11 and TAC beginning from day -3. Patients received G-CSF (Tbo-Filgrastim) starting from day +5 in the haplo-HCT group and after the last dose of MTX in the MD-HCT group, until ANC was >500 for 2 consecutive days. Patients in both cohorts received acyclovir for viral prophylaxis, with the exception of seven patients in the haplo-HCT group that also received letermovir per institutional policy, after it was approved for cytomegalovirus (CMV) prophylaxis. Any CMV DNA detectable by PCR above the sensitivity threshold after transplant was considered as viral reactivation. Flow cytometry staining for immune reconstitution analysis was performed on fresh whole blood samples. For analysis, both percentages and absolute numbers of the parental cells were considered. Absolute numbers were calculated from the complete blood

cell count (CBC) performed on the same day as flow cytometry analysis. For mass cytometry by time of flight (CyTOF) and NK functional assays, PBMC were isolated from freshly drawn blood samples by density gradient centrifugation (Ficoll-Paque PLUS; GE Healthcare) and cryopreserved in RPMI 10% DMSO before being utilized.

### **Analysis of single cell mass cytometry data for NK cell characterization**

NK cells were identified by 2-dimensional gating for the expression of CD45<sup>+</sup>CD3<sup>-</sup>CD19<sup>-</sup>CD14<sup>-</sup>CD56<sup>+</sup> markers (supplemental Figure 3). Dimensionality reduction was performed on a concatenated dataset after downsampling NK cells to 5000 events from each sample (approx. 60000 total events for analysis performed at 1 month and 100000 events at 3 months). To interpret high dimensional single-cell data that were produced by mass cytometry, we used a tool based on the viSNE algorithm,<sup>1</sup> which allows visualization of high-dimensional cytometry data on a 2-dimensional map at single-cell resolution and preserve the nonlinearity.<sup>2</sup> In the viSNE map, cell position reflects their proximity in high dimensional space based on the similarity of marker expression. A FlowSOM analysis<sup>3</sup> was then run to identify distinct NK cell meta-clusters. A self-organized map (SOM) is an unsupervised technique for clustering and dimensionality reduction, in which a discretized representation of the input space is trained.<sup>4</sup>

### **Flow cytometry-based NK functional assay**

NK activation after co-culture with target cells was evaluated by measuring the expression of CD107a as a marker of degranulation and by cytokine (IFN $\gamma$  and TNF $\alpha$ ) release. PBMC from patients and HD were thawed using CTL Anti-Aggregate (CTL-AA-001, Cellular Technology

Limited) solution (1:20 dilution with RPMI) and then resuspended in RPMI medium with 10% FBS. After thawing, PBMC were left at 37°C overnight in the presence or absence of IL-15 (5 ng/ml) (Miltenyi Biotec) for NK priming. PBMC were then washed 2 times and cultured for 6 hours at 37 with K562 cells (effector:target ratio 5:1) previously stained with Cell Trace Violet (CTV, Invitrogen C34557) according to the manufacturer's recommended protocol. To detect cytokine release, Golgi Stop (Protein transport inhibitor Monensin BD 554724) and Golgi Plug (Protein transport inhibitor Brefeldin A BD 51-2301KZ) were added after 1 h of co-culture. After co-culture, cells were collected and stained using a panel of surface and intracellular mAbs shown in supplemental Table 4. Zombie Red staining (Biolegend 423109) was used to distinguish live and dead cells. Samples were then resuspended in PBS 2% FBS and acquired on Fortessa LSR flow cytometer (BD). FCS files were analyzed using FlowJo Version 10 software. An example of the gating strategy is shown in supplemental Figure 4.

## **Statistical analysis**

Patient baseline characteristics and immunophenotype data were analyzed primarily descriptively. Overall survival (OS) was defined as the time from stem cell transplant to death from any cause. Progression-free survival (PFS) was defined as the time from stem cell infusion to disease relapse, progression or death from any cause, whichever occurred first. Patients who were alive without disease relapse or progression were censored at the time of the last visit. The Kaplan-Meier method was used to estimate PFS and OS whereas cumulative incidence of non-relapse mortality (NRM), relapse, and GVHD was estimated in the context of a competing risks framework considering relapse for NRM, NRM for relapse, and death or relapse without developing GVHD for GVHD as a competing event. The log-rank and Gray tests<sup>5</sup> were used for

comparing estimates of PFS and OS and estimates of cumulative incidence of NRM and relapse, respectively. Immunophenotype data, CyTOF data and NK functional data were compared using the Wilcoxon rank-sum test for unpaired group comparison and the Wilcoxon signed-rank test for paired comparison. All tests were 2-sided at the significance level of 0.05 and multiple comparisons were not considered. Statistical analyses for immune reconstitution analysis were performed using SAS version 9.2 (SAS Institute, Inc., Cary, NC) and R version 3.3.2 (the CRAN project), while functional and CyTOF data were analyze using Prism software (GraphPad). All graphs were made using Prism software (GraphPad). Heatmaps were generated using GENE-E (<http://www.broadinstitute.org/cancer/software/GENE-E>).

## SUPPLEMENTAL REFERENCES

1. van der Maaten L, Hinton G. Visualizing Data using t-SNE. *J. Mach. Learn. Res.* 2008;9:2579–2605.
2. Amir ED, Davis KL, Tadmor MD, et al. viSNE enables visualization of high dimensional single-cell data and reveals phenotypic heterogeneity of leukemia. *Nat. Biotechnol.* 2013;31(6):545–552.
3. Van Gassen S, Callebaut B, Van Helden MJ, et al. FlowSOM: Using self-organizing maps for visualization and interpretation of cytometry data. *Cytom. Part A.* 2015;87(7):636–645.
4. Kohonen T. Improved versions of learning vector quantization. *1990 IJCNN Int. Jt. Conf. Neural Networks.* 1990;545–550 vol.1.
5. Gray RJ. A Class of K-Sample Tests for Comparing the Cumulative Incidence of a Competing Risk. *Ann. Stat.* 1988;16(3):1141–1154.
6. Chen Y-B, McDonough S, Hasserjian R, et al. Expression of CD30 in patients with acute graft-versus-host disease. *Blood.* 2012;120(3):691–696.
7. Tinago W, Coghlan E, Macken A, et al. Clinical, Immunological and Treatment-Related Factors Associated with Normalised CD4+/CD8+ T-Cell Ratio: Effect of Naïve and Memory T-Cell Subsets. *PLoS One.* 2014;9(5):e97011.

| <i>Months after HCT</i> | <i>1</i> | <i>2</i> | <i>3</i> | <i>6</i> | <i>9</i> | <i>12</i> | <i>18</i> | <i>24</i> |
|-------------------------|----------|----------|----------|----------|----------|-----------|-----------|-----------|
| <i>Haplo-HCT, n</i>     | 37       | 51       | 46       | 36       | 24       | 25        | 18        | 17        |
| <i>MD-HCT, n</i>        | 21       | 26       | 20       | 14       | 14       | 12        | 10        | 7         |

**Table S1.** Number of samples tested by flow cytometry at each time point after transplant were used for graphs displayed in Figures 1, 2, 3 and 6. Missing data 1 month after HCT was due to technical difficulties drawing samples on inpatient hospital units. This trend was proportionally similar between the two cohorts: 37/60 (62%) and 51/60 (85%) haplo-HCT display a 1 and 2 months sample respectively, versus 21/35 (60%) and 26/35 (74%) for MD-HCT.



| TUBE     | TARGET     | FLUOROCHROME    | CLONE    | COMPANY   | PRODUCT    |
|----------|------------|-----------------|----------|-----------|------------|
| T cells  | CD45RO     | FITC            | UCHL1    | BD        | 555492     |
|          | CD279 PD-1 | PE              | eBioJ105 | eBio      | 12-2799-42 |
|          | CD127      | PE-Cy5          | eBioRDR5 | eBio      | 15-1278-42 |
|          | CD25       | PE-Cy7          | M-A251   | BD        | 557741     |
|          | CD62L      | APC             | DREG-56  | BD        | 559772     |
|          | CD4        | APC-H7          | RPA-T4   | BD        | 560158     |
|          | CD3        | Pac Blue (V450) | UCHT1    | BD        | 560365     |
|          | CD8        | BV510           | RPA-T8   | BioLegend | 301047     |
| B cells  | BAFF-R     | FITC            | 8A7      | eBio      | 11-9117-42 |
|          | IgD        | PE              | IA6-2    | BD        | 555779     |
|          | CD27       | PE-Cy5          | O323     | eBio      | 15-0279-42 |
|          | CD38       | PE-Cy7          | HIT2     | BD        | 560677     |
|          | CD19       | APC             | HIB19    | BD        | 555415     |
|          | CD20       | APC-H7          | 2H7      | BD        | 560734     |
|          | CD5        | Pac Blue (V450) | UCHT2    | BD        | 561154     |
|          | CD45       | BV510           | HI30     | BD        | 563204     |
| NK cells | CD16       | FITC            | 3G8      | BD        | 555406     |
|          | CD56       | PE              | B159     | BD        | 555516     |
|          | CD8        | PE-Cy7          | RPA-T8   | BD        | 557746     |
|          | NKG2D      | APC             | 1D11     | BD        | 558071     |
|          | CD45       | APC-H7          | 2D1      | BD        | 560178     |
|          | CD3        | Pac Blue (V450) | UCHT1    | BD        | 560365     |
|          | CD4        | BV510           | SK3      | BD        | 562970     |

**Table S2.** Conjugated monoclonal antibodies in the flow cytometry immune monitoring panel.

|                      | TARGET                | SPECIES | CLONE   | ISOTOPE | COMPANY       |
|----------------------|-----------------------|---------|---------|---------|---------------|
| <b>Surface</b>       |                       |         |         |         |               |
| 1                    | CD45                  | Human   | HI30    | 89Y     | Fluidigm      |
| 2                    | HLA-DR                | Cross   | L243    | 141Pr   | Biolegend     |
| 3                    | CD95                  | Human   | DX2     | 164Dy   | Fluidigm      |
| 4                    | CD3                   | Human   | UCHT1   | 170Er   | Fluidigm      |
| 5                    | CD4                   | Human   | SK3     | 174Yb   | Fluidigm      |
| 6                    | CD8                   | Human   | SK1     | 168Er   | Fluidigm      |
| 7                    | CD25                  | Human   | 2A3     | 149Sm   | Fluidigm      |
| 8                    | CD14                  | Human   | M5E2    | 160Gd   | Fluidigm      |
| 9                    | CD19                  | Human   | HIB19   | 142Nd   | Fluidigm      |
| 10                   | CD56                  | Human   | HCD56   | 145Nd   | Biolegend     |
| 11                   | CD16                  | Human   | 3G8     | 209Bi   | Fluidigm      |
| 12                   | CD57                  | Human   | HCD57   | 165Ho   | BioLegend     |
| 13                   | CCR7                  | Human   | G043H7  | 148Nd   | BioLegend     |
| 14                   | CD62L                 | Human   | DREG-56 | 153Eu   | Fluidigm      |
| 15                   | CD69                  | Human   | FN50    | 163Dy   | Biolegend     |
| 16                   | TIM-3                 | Human   | F38-2E2 | 144Nd   | BioLegend     |
| 17                   | ICOS(CD278)           | Human   | DX29    | 151Eu   | Fluidigm      |
| 18                   | ILT1 (CD85h)          | Human   | 24      | 115In   | Biolegend     |
| 19                   | NKp30 (CD337)         | Human   | Z25     | 159Tb   | Fluidigm      |
| 20                   | NKp44 (CD336)         | Human   | P44-8   | 147Sm   | Biolegend     |
| 21                   | NKp46 (CD335)         | Human   | BAB281  | 162Dy   | Fluidigm      |
| 22                   | NKG2D (CD314)         | Human   | 1D11    | 161Dy   | BD Bioscience |
| 23                   | NKG2C(CD195c)         | Human   | 134591  | 166Er   | R&D           |
| 24                   | DNAM1(CD226)          | Human   | DX11    | 152Sm   | BD Bioscience |
| 25                   | NKG2A (CD94a)         | Human   | Z199    | 169Tm   | Fluidigm      |
| 26                   | ILT2 (CD85j)          | Human   | GHI/75  | 156Gd   | Fluidigm      |
| 27                   | KIR2DL1/DS1(CD158a,h) | Human   | EB6B    | 158Gd   | Milteni       |
| 28                   | KIR2DL2/2DS3(CD158b)  | Human   | CH-L    | 172Yb   | BD Bioscience |
| 29                   | KIR3DL1               | Human   | DX9     | 167Er   | Fluidigm      |
| 30                   | TIGIT                 | Human   | MBSA43  | 154Sm   | Fluidigm      |
| 31                   | TRAIL                 | Human   | RIK-2   | 150Sm   | Biolegend     |
| <b>Intracellular</b> |                       |         |         |         |               |
| 32                   | Ki67                  | Cross   | B56     | 176Yb   | BD Bioscience |
| 33                   | CTLA-4(CD152)         | Human   | 14D3    | 146Nd   | eBioscience   |
| 34                   | Perforin              | Human   | B-D48   | 175Lu   | Fluidigm      |
| 35                   | GranzymeB             | Human   | GB11    | 173Tb   | Fluidigm      |

**Table S3.** Antibody-metal conjugate panel used for mass cytometry.

| TARGET                          | FLUOROCHROME | CLONE         | COMPANY       | PRODUCT |
|---------------------------------|--------------|---------------|---------------|---------|
| Extracellular                   |              |               |               |         |
| <b>CD3</b>                      | AF 700       | UCHT1         | BD Pharmingen | 557943  |
| <b>CD56</b>                     | BV 510       | HCD56<br>NCAM | Biolegend     | 318340  |
| <b>CD16</b>                     | APC/Cy7      | 3G8           | Biolegend     | 302018  |
| <b>CD107a LAMP-1</b>            | APC          | H4A3          | Biolegend     | 328620  |
| <b>Isotype mouse<br/>IgG1 k</b> | APC          | MOPC-<br>21   | Biolegend     | 400122  |
| Intracellular                   |              |               |               |         |
| <b>IFN<math>\gamma</math></b>   | PE-Cy7       | B27           | BD Pharmingen | 557643  |
| <b>Isotype mouse<br/>IgG1 k</b> | PE-Cy7       | MOPC-<br>21   | BD Pharmingen | 557872  |
| <b>TNF<math>\alpha</math></b>   | FITC         | MAb11         | BD Pharmingen | 552889  |
| <b>Isotype mouse<br/>IgG1 k</b> | FITC         | MOPC-<br>21   | BD Pharmingen | 555748  |

**Table S4.** Conjugated monoclonal antibodies used in the flow cytometry NK functional assay panel.

| UPN      | Disease | Sample 1 Mo | Sample 3 Mo | AGE at HCT | SEX | CMV | DAY from HCT to CMV | aGVHD | DAY from HCT to aGVHD | cGVHD | DAY from HCT to cGVHD | Relapse | DAY from HCT to relapse |
|----------|---------|-------------|-------------|------------|-----|-----|---------------------|-------|-----------------------|-------|-----------------------|---------|-------------------------|
| Haplo_1  | NHL     | Yes         | No          | 64         | F   | Yes | 31                  | Yes   | 31                    | No    |                       | No      |                         |
| Haplo_2  | NHL     | Yes         | Yes         | 68         | M   | Yes | 41                  | No    |                       | Yes   | 202                   | Yes     | 614                     |
| Haplo_3  | MDS     | Yes         | Yes         | 68         | M   | No  |                     | Yes   | 68                    | Yes   | 817                   | No      |                         |
| Haplo_4  | MDS     | Yes         | Yes         | 75         | M   | Yes | 35                  | Yes   | 163                   | No    |                       | No      |                         |
| Haplo_5  | NHL     | Yes         | No          | 49         | F   | No  |                     | No    |                       | No    |                       | Yes     | 63                      |
| Haplo_6  | NHL     | Yes         | Yes         | 52         | M   | Yes | 41                  | Yes   | 41                    | No    |                       | No      |                         |
| Haplo_7  | NHL     | No          | Yes         | 53         | M   | Yes | 41                  | No    |                       | Yes   | 246                   | No      |                         |
| Haplo_8  | NHL     | No          | Yes         | 56         | M   | No  |                     | Yes   | 40                    | No    |                       | No      |                         |
| Haplo_9  | CML     | No          | Yes         | 20         | M   | No  |                     | No    |                       | No    |                       | No      |                         |
| Haplo_10 | MDS     | No          | Yes         | 73         | M   | Yes | 49                  | Yes   | 114                   | No    |                       | No      |                         |
| MDs_1    | HD      | Yes         | Yes         | 24         | M   | No  |                     | No    |                       | No    |                       | Yes     | 111                     |
| MDs_2    | ALL     | Yes         | No          | 68         | F   | No  |                     | No    |                       | Yes   | 223                   | Yes     | 130                     |
| MDs_3    | HD      | Yes         | Yes         | 45         | M   | Yes | 237                 | Yes   | 211                   | No    |                       | No      |                         |
| MDs_4    | NHL     | Yes         | Yes         | 64         | M   | No  |                     | Yes   | 27                    | Yes   | 197                   | No      |                         |
| MD_1     | MDS     | No          | Yes         | 68         | M   | No  |                     | Yes   | 55                    | Yes   | 302                   | No      |                         |
| MD_2     | AML     | No          | Yes         | 64         | M   | No  |                     | No    |                       | Yes   | 165                   | No      |                         |
| MD_3     | AML     | No          | Yes         | 73         | M   | No  |                     | Yes   | 42                    | Yes   | 488                   | No      |                         |
| MD_4     | MDS     | No          | Yes         | 68         | F   | No  |                     | No    |                       | Yes   | 264                   | No      |                         |
| MD_5     | HD      | No          | Yes         | 19         | F   | No  |                     | No    |                       | No    |                       | No      |                         |
| MD_6     | PMF     | No          | Yes         | 65         | M   | No  |                     | No    |                       | Yes   | 202                   | No      |                         |

**Table S5.** Clinical characteristics of patients tested in CyTOF assay at 1 and 3 months after HCT. Samples were selected based on the availability of an adequate number of frozen cells. Haploidentical cell transplantation (HAPLO), matched donor cell transplantation with sirolimus/TAC/MTX GVHD prophylaxis (MDs) and matched donor cell transplantation with TAC/MTX GVHD prophylaxis (MD).

| UPN      | Disease | Age | Sex | CMV | DAY from HCT to CMV | aGVHD | cGVHD | DAY from HCT to cGVHD | Relapse | DAY from HCT to relapse |
|----------|---------|-----|-----|-----|---------------------|-------|-------|-----------------------|---------|-------------------------|
| Haplo_2  | NHL     | 68  | M   | Yes | 41                  | No    | Yes   | 202                   | Yes     | 614                     |
| Haplo_5  | NHL     | 49  | F   | No  |                     | No    | No    |                       | Yes     | 63                      |
| Haplo_11 | AML     | 63  | F   | No  |                     | No    | No    |                       | Yes     | 132                     |
| Haplo_12 | HD      | 38  | F   | No  |                     | No    | No    |                       | No      |                         |
| Haplo_13 | ALL     | 55  | F   | Yes | 26                  | No    | No    |                       | Yes     | 72                      |
| Haplo_14 | NHL     | 39  | F   | Yes | 40                  | No    | No    |                       | Yes     | 980                     |
| Haplo_15 | NHL     | 69  | M   | No  |                     | No    | No    |                       | No      |                         |
| Haplo_16 | MDS     | 73  | M   | No  |                     | No    | No    |                       | No      |                         |
| Haplo_17 | MDS     | 47  | M   | No  |                     | No    | Yes   | 145                   | No      |                         |
| MD_2     | AML     | 64  | M   | No  |                     | No    | Yes   | 165                   | No      |                         |
| MD_4     | MDS     | 68  | F   | No  |                     | No    | Yes   | 264                   | No      |                         |
| MD_5     | HD      | 19  | F   | No  |                     | No    | No    |                       | No      |                         |
| MD_7     | MDS     | 70  | F   | No  |                     | No    | No    |                       | No      |                         |
| MD_8     | ALL     | 74  | M   | Yes | 176                 | No    | Yes   | 225                   | No      |                         |
| MD_9     | CMML    | 67  | M   | No  |                     | No    | No    |                       | Yes     | 61                      |
| MD_10    | AML     | 62  | M   | No  |                     | No    | No    |                       | Yes     | 91                      |
| MD_11    | AML     | 66  | M   | No  |                     | No    | Yes   | 120                   | No      |                         |
| MD_12    | AML     | 61  | F   | Yes | 51                  | No    | No    |                       | Yes     | 58                      |

**Table S6.** Clinical characteristics of patients tested in NK functional assays 2 months after HCT.

Samples were selected based on the availability of an adequate number of cryopreserved cells.

|                                      | Months | MD-HCT |        |        |        | Haplo-HCT |        |       |        | p-value          |
|--------------------------------------|--------|--------|--------|--------|--------|-----------|--------|-------|--------|------------------|
|                                      |        | N      | Med    | Q1     | Q3     | N         | Med    | Q1    | Q3     |                  |
| <b>ALC</b>                           | 1      | 21     | 693    | 495.9  | 1084.6 | 37        | 210    | 120   | 514.08 | <b>0.0002</b>    |
|                                      | 2      | 26     | 814.59 | 700.05 | 1397   | 51        | 699.3  | 375   | 1216.8 | 0.10             |
|                                      | 3      | 20     | 893.4  | 645    | 1378.2 | 46        | 658.3  | 384.2 | 882    | 0.07             |
|                                      | 6      | 14     | 993.3  | 522.0  | 1114.1 | 36        | 1071.1 | 531.6 | 1511.7 | 0.66             |
|                                      | 9      | 14     | 1240.7 | 1039.5 | 1472.2 | 24        | 1360.7 | 625.4 | 2368.2 | 0.80             |
|                                      | 12     | 12     | 1228.7 | 840.5  | 2368.4 | 25        | 1026.8 | 750.0 | 2494.4 | 0.66             |
|                                      | 18     | 10     | 1296.2 | 851.4  | 1793.0 | 18        | 1674.2 | 821.3 | 2723.2 | 0.28             |
|                                      | 24     | 7      | 956.8  | 863.3  | 1828.3 | 17        | 1679.9 | 871.7 | 2651.0 | 0.31             |
| <b>CD3<sup>+</sup></b>               | 1      | 21     | 337.5  | 263.6  | 458.6  | 37        | 65.4   | 25.4  | 147.1  | <b>&lt;.0001</b> |
|                                      | 2      | 26     | 420.5  | 255.8  | 695.7  | 51        | 305.0  | 113.4 | 616.9  | 0.11             |
|                                      | 3      | 20     | 443.2  | 257.4  | 803.8  | 46        | 176.4  | 113.8 | 404.5  | <b>0.013</b>     |
|                                      | 6      | 14     | 526.2  | 374.3  | 746.2  | 36        | 426.2  | 184.1 | 891.9  | 0.87             |
|                                      | 9      | 14     | 667.5  | 501.2  | 934.9  | 24        | 600.7  | 260.6 | 1514.5 | 0.92             |
|                                      | 12     | 12     | 624.2  | 465.1  | 1289.7 | 25        | 481.4  | 318.3 | 1514.1 | 0.62             |
|                                      | 18     | 10     | 829.7  | 272.6  | 1228.2 | 18        | 881.9  | 504.7 | 1607.6 | 0.40             |
|                                      | 24     | 7      | 408.3  | 163.4  | 1170.1 | 17        | 851.7  | 329.2 | 1895.5 | 0.20             |
| <b>CD19<sup>+</sup></b>              | 1      | 21     | 11.3   | 5.4    | 18.3   | 37        | 1.8    | 0.6   | 4.0    | <b>&lt;.0001</b> |
|                                      | 2      | 26     | 35.3   | 17.6   | 97.3   | 51        | 10.4   | 4.2   | 47.6   | <b>0.0065</b>    |
|                                      | 3      | 20     | 73.0   | 21.1   | 120.2  | 46        | 35.0   | 6.5   | 158.9  | 0.28             |
|                                      | 6      | 14     | 49.4   | 5.7    | 135.3  | 36        | 76.4   | 21.3  | 206.4  | 0.44             |
|                                      | 9      | 14     | 181.3  | 69.6   | 243.0  | 24        | 118.4  | 76.1  | 211.6  | 0.58             |
|                                      | 12     | 12     | 105.7  | 26.0   | 160.8  | 25        | 114.8  | 74.3  | 270.8  | 0.51             |
|                                      | 18     | 10     | 123.8  | 40.4   | 362.4  | 18        | 267.6  | 167.0 | 408.0  | 0.22             |
|                                      | 24     | 7      | 70.3   | 54.4   | 144.6  | 17        | 280.0  | 183.3 | 323.2  | <b>0.049</b>     |
| <b>CD56<sup>+</sup>3<sup>-</sup></b> | 1      | 21     | 115.3  | 77.1   | 221.8  | 37        | 52.7   | 23.9  | 130.1  | <b>0.03</b>      |
|                                      | 2      | 26     | 163.2  | 95.2   | 271.9  | 51        | 153.1  | 103.4 | 272.8  | 0.70             |
|                                      | 3      | 20     | 178.8  | 122.6  | 226.7  | 46        | 156.6  | 72.9  | 248.2  | 0.66             |
|                                      | 6      | 13     | 109.0  | 76.6   | 136.5  | 36        | 184.8  | 102.7 | 264.4  | 0.10             |

|                                      |    |    |       |      |       |    |       |       |       |                  |
|--------------------------------------|----|----|-------|------|-------|----|-------|-------|-------|------------------|
|                                      | 9  | 14 | 126.9 | 80.7 | 237.0 | 24 | 119.9 | 71.5  | 416.0 | 0.75             |
|                                      | 12 | 12 | 164.6 | 72.7 | 205.3 | 25 | 113.1 | 87.8  | 198.6 | 0.99             |
|                                      | 18 | 10 | 172.9 | 95.3 | 220.8 | 18 | 176.9 | 110.7 | 330.9 | 0.55             |
|                                      | 24 | 7  | 192.5 | 65.8 | 268.3 | 17 | 182.8 | 93.0  | 238.2 | 0.95             |
| <b>CD56<sup>+</sup>3<sup>+</sup></b> | 1  | 20 | 15.9  | 8.7  | 42.9  | 36 | 1.1   | 0.4   | 3.1   | <b>&lt;.0001</b> |
|                                      | 2  | 26 | 22.8  | 11.4 | 61.7  | 52 | 3.7   | 1.6   | 8     | <b>&lt;.0001</b> |
|                                      | 3  | 20 | 33.4  | 11.2 | 90    | 49 | 4.3   | 1.5   | 9.7   | <b>&lt;.0001</b> |
|                                      | 6  | 13 | 16.1  | 8.4  | 71.3  | 41 | 8.2   | 2.7   | 14.9  | <b>0.04</b>      |
|                                      | 9  | 14 | 33.6  | 6.7  | 87.4  | 28 | 10.4  | 3.1   | 24.2  | <b>0.0217</b>    |
|                                      | 12 | 11 | 48.5  | 4.9  | 77.6  | 26 | 10.8  | 3.3   | 23.6  | <b>0.0249</b>    |
|                                      | 18 | 10 | 45.2  | 13.3 | 65.4  | 20 | 14.9  | 6     | 26.8  | <b>0.0408</b>    |
|                                      | 24 | 7  | 53    | 18.2 | 86.7  | 20 | 16.2  | 7     | 27.3  | 0.0563           |

**Table S7.** The median absolute values (cells/ $\mu$ L) along with corresponding inter-quartile values and p-values referring to Figures 1A and 1C.

|                                                                                             | Months | MD-HCT |      |      | Haplo-HCT |    |      | Q1   | Q3   | P-value          |
|---------------------------------------------------------------------------------------------|--------|--------|------|------|-----------|----|------|------|------|------------------|
|                                                                                             |        | N      | Med  | Q1   | Q3        | N  | Med  |      |      |                  |
| <b>Treg<br/>(CD4<sup>+</sup>25<sup>+</sup>127<sup>-</sup>)</b>                              | 1      | 21     | 11.6 | 4.9  | 14.8      | 37 | 2.6  | 1.2  | 7.7  | <b>0.0002</b>    |
|                                                                                             | 2      | 26     | 12.3 | 6.9  | 18.3      | 51 | 7.7  | 4.0  | 15.4 | 0.09             |
|                                                                                             | 3      | 20     | 11.9 | 5.4  | 20.7      | 45 | 10.4 | 5.7  | 16.0 | 0.59             |
|                                                                                             | 6      | 14     | 13.5 | 5.6  | 30.6      | 36 | 14.1 | 8.1  | 19.1 | 0.91             |
|                                                                                             | 9      | 14     | 15.8 | 10.2 | 56.6      | 24 | 17.5 | 10.1 | 31.9 | 0.75             |
|                                                                                             | 12     | 12     | 17.9 | 10.3 | 39.9      | 25 | 15.8 | 8.6  | 23.5 | 0.47             |
|                                                                                             | 18     | 10     | 10.9 | 4.5  | 25.2      | 18 | 21.4 | 16.7 | 31.2 | 0.06             |
|                                                                                             | 24     | 7      | 8.8  | 3.5  | 27.6      | 17 | 21.1 | 16.1 | 36.5 | 0.31             |
| <b>Treg EM<br/>(CD25<sup>+</sup>127<sup>-</sup><br/>45RO<sup>+</sup>62L<sup>-</sup>)</b>    | 1      | 21     | 2.4  | 1.2  | 5.8       | 37 | 0.9  | 0.4  | 2.6  | <b>0.01</b>      |
|                                                                                             | 2      | 26     | 3.2  | 2.3  | 4.8       | 51 | 3.2  | 1.5  | 7.6  | 0.68             |
|                                                                                             | 3      | 20     | 2.9  | 1.2  | 5.3       | 45 | 3.8  | 1.3  | 8.6  | 0.19             |
|                                                                                             | 6      | 14     | 3.7  | 0.5  | 9.2       | 36 | 6.3  | 3.1  | 9.7  | 0.16             |
|                                                                                             | 9      | 14     | 3.5  | 1.1  | 9.9       | 24 | 6.4  | 3.4  | 17.2 | 0.20             |
|                                                                                             | 12     | 12     | 4.6  | 2.1  | 9.0       | 25 | 4.2  | 1.4  | 9.7  | 0.64             |
|                                                                                             | 18     | 10     | 3.7  | 2.7  | 4.9       | 18 | 6.6  | 3.5  | 13.1 | 0.09             |
|                                                                                             | 24     | 7      | 2.5  | 1.5  | 7.1       | 17 | 8.6  | 6.1  | 10.8 | 0.09             |
| <b>Treg CM<br/>(CD25<sup>+</sup>127<sup>-</sup><br/>45RO<sup>+</sup>62L<sup>+</sup>)</b>    | 1      | 21     | 5.5  | 2.6  | 7.8       | 37 | 1.2  | 0.2  | 2.9  | <b>0.0003</b>    |
|                                                                                             | 2      | 26     | 5.3  | 2.4  | 9.5       | 51 | 2.6  | 1.1  | 5.2  | <b>0.023</b>     |
|                                                                                             | 3      | 20     | 8.1  | 1.5  | 10.9      | 45 | 4.0  | 1.6  | 7.3  | 0.19             |
|                                                                                             | 6      | 14     | 6.1  | 4.0  | 15.5      | 36 | 4.5  | 1.6  | 7.3  | 0.16             |
|                                                                                             | 9      | 14     | 7.5  | 2.6  | 22.1      | 24 | 6.2  | 2.8  | 8.7  | 0.30             |
|                                                                                             | 12     | 12     | 11.6 | 5.0  | 17.1      | 25 | 6.3  | 2.0  | 15.0 | 0.31             |
|                                                                                             | 18     | 10     | 4.7  | 1.6  | 13.3      | 18 | 7.6  | 3.9  | 16.0 | 0.46             |
|                                                                                             | 24     | 7      | 2.1  | 0.8  | 6.0       | 17 | 11.8 | 3.0  | 17.1 | 0.11             |
| <b>Treg TEMRA<br/>(CD25<sup>+</sup>127<sup>-</sup><br/>45RO<sup>-</sup>62L<sup>-</sup>)</b> | 1      | 21     | 0.57 | 0.36 | 0.80      | 37 | 0.05 | 0.02 | 0.26 | <b>&lt;.0001</b> |
|                                                                                             | 2      | 26     | 0.49 | 0.14 | 1.30      | 51 | 0.21 | 0.09 | 0.64 | 0.07             |
|                                                                                             | 3      | 20     | 0.37 | 0.06 | 0.94      | 45 | 0.31 | 0.12 | 0.72 | 0.94             |



|                                                                                             |    |    |       |       |       |    |       |       |       |                  |
|---------------------------------------------------------------------------------------------|----|----|-------|-------|-------|----|-------|-------|-------|------------------|
|                                                                                             | 6  | 14 | 0.38  | 0.00  | 2.07  | 36 | 0.69  | 0.25  | 1.85  | 0.31             |
|                                                                                             | 9  | 14 | 1.77  | 0.38  | 3.09  | 24 | 0.82  | 0.22  | 2.55  | 0.47             |
|                                                                                             | 12 | 12 | 0.82  | 0.33  | 2.97  | 25 | 0.46  | 0.16  | 2.13  | 0.29             |
|                                                                                             | 18 | 10 | 0.87  | 0.14  | 2.59  | 18 | 1.55  | 0.30  | 3.06  | 0.72             |
|                                                                                             | 24 | 7  | 0.71  | 0.34  | 4.34  | 17 | 1.56  | 0.67  | 3.28  | 0.41             |
| <b>Treg naïve<br/>(CD25<sup>+</sup>127<sup>-</sup><br/>45RO<sup>+</sup>62L<sup>+</sup>)</b> | 1  | 21 | 0.74  | 0.28  | 1.39  | 37 | 0.03  | 0.00  | 0.22  | <b>&lt;.0001</b> |
|                                                                                             | 2  | 26 | 0.60  | 0.14  | 2.40  | 51 | 0.10  | 0.02  | 0.23  | <b>0.0002</b>    |
|                                                                                             | 3  | 20 | 0.69  | 0.18  | 2.59  | 45 | 0.26  | 0.08  | 0.56  | <b>0.03</b>      |
|                                                                                             | 6  | 14 | 0.48  | 0.22  | 3.32  | 36 | 0.30  | 0.08  | 0.69  | 0.06             |
|                                                                                             | 9  | 14 | 1.80  | 0.49  | 6.11  | 24 | 0.34  | 0.09  | 0.57  | <b>0.0027</b>    |
|                                                                                             | 12 | 12 | 1.20  | 0.70  | 2.79  | 25 | 0.45  | 0.11  | 1.34  | <b>0.05</b>      |
|                                                                                             | 18 | 10 | 0.56  | 0.21  | 3.53  | 18 | 0.47  | 0.13  | 0.92  | 0.61             |
|                                                                                             | 24 | 7  | 0.33  | 0.15  | 5.75  | 17 | 0.80  | 0.10  | 1.57  | 1.00             |
| <b>Tcon</b>                                                                                 | 1  | 21 | 193.5 | 119.5 | 248.7 | 37 | 18.7  | 6.8   | 35.7  | <b>&lt;.0001</b> |
|                                                                                             | 2  | 26 | 219.0 | 124.4 | 298.3 | 51 | 102.3 | 39.7  | 192.0 | <b>0.0041</b>    |
|                                                                                             | 3  | 20 | 220.2 | 110.6 | 408.6 | 45 | 90.1  | 51.7  | 136.6 | <b>0.0038</b>    |
|                                                                                             | 6  | 14 | 225.7 | 141.3 | 404.5 | 36 | 153.0 | 108.3 | 226.2 | 0.11             |
|                                                                                             | 9  | 14 | 300.4 | 161.2 | 348.6 | 24 | 208.3 | 129.1 | 304.5 | 0.20             |
|                                                                                             | 12 | 12 | 293.6 | 213.9 | 351.7 | 25 | 206.0 | 119.0 | 396.8 | 0.36             |
|                                                                                             | 18 | 10 | 292.0 | 133.5 | 613.9 | 18 | 341.1 | 236.6 | 448.4 | 0.79             |
|                                                                                             | 24 | 7  | 238.5 | 66.6  | 432.3 | 17 | 298.5 | 188.4 | 458.3 | 0.48             |
| <b>Tcon EM (Tcon<br/>45RO<sup>+</sup>62L<sup>-</sup>)</b>                                   | 1  | 21 | 51.0  | 37.0  | 82.3  | 37 | 8.7   | 2.7   | 18.5  | <b>&lt;.0001</b> |
|                                                                                             | 2  | 26 | 64.0  | 25.3  | 103.9 | 51 | 60.8  | 25.7  | 123.4 | 0.80             |
|                                                                                             | 3  | 20 | 62.1  | 37.2  | 87.9  | 45 | 57.5  | 29.8  | 91.3  | 0.76             |
|                                                                                             | 6  | 14 | 52.0  | 39.3  | 129.9 | 36 | 99.3  | 58.4  | 158.4 | 0.16             |
|                                                                                             | 9  | 14 | 70.5  | 33.9  | 105.1 | 24 | 139.6 | 86.1  | 196.0 | <b>0.019</b>     |
|                                                                                             | 12 | 12 | 76.8  | 57.4  | 101.5 | 25 | 126.7 | 53.2  | 181.6 | 0.57             |
|                                                                                             | 18 | 10 | 102.2 | 61.5  | 269.3 | 18 | 143.0 | 76.0  | 264.2 | 0.38             |
|                                                                                             | 24 | 7  | 87.1  | 24.4  | 218.1 | 17 | 134.5 | 100.3 | 274.3 | 0.20             |
|                                                                                             | 1  | 21 | 60.6  | 28.4  | 82.9  | 37 | 7.1   | 0.9   | 15.6  | <b>&lt;.0001</b> |

|                                                          |    |       |       |       |       |       |       |       |        |                  |
|----------------------------------------------------------|----|-------|-------|-------|-------|-------|-------|-------|--------|------------------|
| <b>Tcon CM (Tcon 45RO<sup>+</sup>62L<sup>+</sup>)</b>    | 2  | 26    | 44.7  | 9.9   | 125.9 | 51    | 9.6   | 4.4   | 33.8   | <b>0.0032</b>    |
|                                                          | 3  | 20    | 62.7  | 15.8  | 115.9 | 45    | 14.9  | 7.9   | 35.8   | 0.01             |
|                                                          | 6  | 14    | 40.6  | 19.1  | 100.5 | 36    | 20.9  | 10.2  | 37.3   | 0.04             |
|                                                          | 9  | 14    | 49.9  | 15.7  | 80.9  | 24    | 25.9  | 12.3  | 46.2   | 0.30             |
|                                                          | 12 | 12    | 56.7  | 30.0  | 121.4 | 25    | 32.8  | 18.2  | 80.6   | 0.29             |
|                                                          | 18 | 10    | 38.8  | 4.7   | 162.7 | 18    | 59.6  | 18.6  | 122.8  | 0.58             |
|                                                          | 24 | 7     | 29.9  | 4.7   | 95.4  | 17    | 72.9  | 23.9  | 104.5  | 0.18             |
| <b>Tcon TEMRA (Tcon 45RO<sup>-</sup>62L<sup>-</sup>)</b> | 1  | 21    | 20.5  | 8.2   | 39.0  | 37    | 0.3   | 0.1   | 1.3    | <b>&lt;.0001</b> |
|                                                          | 2  | 26    | 17.4  | 7.6   | 57.7  | 51    | 3.1   | 1.2   | 9.1    | <b>0.0001</b>    |
|                                                          | 3  | 20    | 22.9  | 7.0   | 38.7  | 45    | 5.3   | 2.6   | 9.3    | <b>0.0033</b>    |
|                                                          | 6  | 14    | 42.0  | 1.9   | 97.4  | 36    | 14.4  | 6.7   | 27.5   | 0.54             |
|                                                          | 9  | 14    | 52.2  | 11.2  | 79.8  | 24    | 15.8  | 7.7   | 32.2   | 0.06             |
|                                                          | 12 | 12    | 60.8  | 20.0  | 73.9  | 25    | 22.1  | 5.2   | 44.1   | <b>0.05</b>      |
|                                                          | 18 | 10    | 56.5  | 34.4  | 127.8 | 18    | 27.8  | 13.8  | 60.8   | 0.14             |
| <b>Tcon naïve (Tcon 45RO<sup>-</sup>62L<sup>+</sup>)</b> | 1  | 21    | 31.8  | 16.0  | 63.4  | 37    | 0.3   | 0.1   | 0.8    | <b>&lt;.0001</b> |
|                                                          | 2  | 26    | 26.0  | 3.0   | 54.6  | 51    | 0.9   | 0.3   | 2.7    | <b>&lt;.0001</b> |
|                                                          | 3  | 20    | 38.0  | 6.1   | 90.0  | 45    | 2.3   | 0.7   | 6.3    | <b>&lt;.0001</b> |
|                                                          | 6  | 14    | 31.8  | 8.5   | 84.9  | 36    | 4.2   | 1.3   | 8.3    | <b>0.0008</b>    |
|                                                          | 9  | 14    | 34.3  | 17.4  | 170.8 | 24    | 4.2   | 1.3   | 9.3    | <b>&lt;.0001</b> |
|                                                          | 12 | 12    | 62.7  | 15.0  | 106.3 | 25    | 11.1  | 1.5   | 18.4   | <b>0.0099</b>    |
|                                                          | 18 | 10    | 41.6  | 5.1   | 83.1  | 18    | 8.1   | 2.8   | 31.4   | 0.35             |
| <b>CD8<sup>+</sup></b>                                   | 24 | 7     | 18.6  | 4.8   | 41.5  | 17    | 17.0  | 5.1   | 34.9   | 0.75             |
|                                                          | 1  | 21    | 88.7  | 45.3  | 163.9 | 37    | 30.2  | 8.6   | 78.5   | <b>0.0066</b>    |
|                                                          | 2  | 26    | 128.7 | 59.1  | 242.8 | 51    | 80.3  | 24.3  | 334.9  | 0.26             |
|                                                          | 3  | 20    | 147.8 | 80.9  | 289.4 | 46    | 64.9  | 16.2  | 198.6  | 0.03             |
|                                                          | 6  | 14    | 202.0 | 116.7 | 266.7 | 36    | 212.6 | 69.8  | 600.5  | 0.69             |
|                                                          | 9  | 14    | 255.0 | 141.7 | 435.0 | 24    | 295.0 | 113.8 | 1098.4 | 0.58             |
|                                                          | 12 | 12    | 261.1 | 156.0 | 558.4 | 25    | 238.3 | 94.0  | 1043.3 | 0.86             |
| 18                                                       | 10 | 187.0 | 108.0 | 747.7 | 18    | 316.0 | 173.9 | 982.1 | 0.30   |                  |

|                                                                       |    |    |       |      |       |    |       |       |       |                  |
|-----------------------------------------------------------------------|----|----|-------|------|-------|----|-------|-------|-------|------------------|
|                                                                       | 24 | 7  | 130.7 | 75.8 | 631.9 | 17 | 321.6 | 111.3 | 867.6 | 0.25             |
| <b>CD8 EM<br/>(CD8<sup>+</sup>45RO<sup>+</sup>62L<sup>-</sup>)</b>    | 1  | 21 | 23.1  | 9.7  | 39.4  | 37 | 11.0  | 4.0   | 43.3  | 0.32             |
|                                                                       | 2  | 26 | 31.3  | 14.0 | 52.4  | 51 | 26.7  | 6.5   | 151.7 | 0.90             |
|                                                                       | 3  | 20 | 32.3  | 16.6 | 72.9  | 46 | 14.8  | 4.7   | 96.1  | 0.17             |
|                                                                       | 6  | 14 | 42.1  | 24.3 | 76.3  | 36 | 63.0  | 30.5  | 266.8 | 0.23             |
|                                                                       | 9  | 14 | 45.7  | 12.2 | 102.8 | 24 | 97.2  | 40.3  | 427.2 | <b>0.04</b>      |
|                                                                       | 12 | 12 | 55.4  | 14.2 | 89.8  | 25 | 73.2  | 32.0  | 285.4 | 0.21             |
|                                                                       | 18 | 10 | 37.3  | 25.4 | 213.9 | 18 | 117.5 | 31.5  | 467.5 | 0.13             |
|                                                                       | 24 | 7  | 23.0  | 15.2 | 410.7 | 17 | 104.1 | 57.2  | 265.7 | 0.10             |
| <b>CD8 CM<br/>(CD8<sup>+</sup>45RO<sup>+</sup>62L<sup>+</sup>)</b>    | 1  | 21 | 5.4   | 3.6  | 8.3   | 37 | 3.7   | 0.9   | 9.3   | 0.15             |
|                                                                       | 2  | 26 | 8.7   | 2.9  | 35.2  | 51 | 8.6   | 0.7   | 17.8  | 0.26             |
|                                                                       | 3  | 20 | 8.9   | 4.9  | 24.5  | 46 | 3.7   | 0.7   | 9.0   | <b>0.0089</b>    |
|                                                                       | 6  | 14 | 8.6   | 4.0  | 24.0  | 36 | 11.0  | 3.4   | 31.3  | 0.84             |
|                                                                       | 9  | 14 | 8.6   | 4.1  | 12.7  | 24 | 15.7  | 7.2   | 28.4  | 0.06             |
|                                                                       | 12 | 12 | 7.3   | 4.9  | 11.7  | 25 | 18.2  | 6.9   | 49.4  | <b>0.03</b>      |
|                                                                       | 18 | 10 | 8.7   | 3.0  | 23.8  | 18 | 19.4  | 14.4  | 51.3  | 0.12             |
|                                                                       | 24 | 7  | 3.0   | 0.6  | 14.7  | 17 | 20.3  | 9.7   | 62.2  | <b>0.02</b>      |
| <b>CD8 TEMRA<br/>(CD8<sup>+</sup>45RO<sup>-</sup>62L<sup>-</sup>)</b> | 1  | 21 | 39.2  | 17.4 | 68.0  | 37 | 4.6   | 1.2   | 17.0  | <b>&lt;.0001</b> |
|                                                                       | 2  | 26 | 55.1  | 24.7 | 81.1  | 51 | 28.3  | 7.7   | 95.2  | 0.06             |
|                                                                       | 3  | 20 | 51.4  | 19.9 | 151.6 | 46 | 23.8  | 7.9   | 58.8  | <b>0.05</b>      |
|                                                                       | 6  | 14 | 117.2 | 21.6 | 156.0 | 36 | 72.8  | 25.7  | 282.2 | 0.80             |
|                                                                       | 9  | 14 | 119.7 | 85.6 | 256.6 | 24 | 120.9 | 31.3  | 439.2 | 0.99             |
|                                                                       | 12 | 12 | 136.2 | 69.0 | 295.5 | 25 | 100.2 | 31.5  | 566.3 | 0.78             |
|                                                                       | 18 | 10 | 103.2 | 64.9 | 403.7 | 18 | 146.6 | 37.1  | 418.5 | 0.90             |
|                                                                       | 24 | 7  | 79.7  | 53.7 | 258.2 | 17 | 193.9 | 58.2  | 495.4 | 0.45             |
| <b>CD8 naïve<br/>(CD8<sup>+</sup>45RO<sup>-</sup>62L<sup>+</sup>)</b> | 1  | 21 | 18.2  | 6.3  | 26.8  | 37 | 1.2   | 0.3   | 2.9   | <b>&lt;.0001</b> |
|                                                                       | 2  | 26 | 21.2  | 5.8  | 39.3  | 51 | 6.9   | 0.8   | 15.5  | <b>0.0017</b>    |
|                                                                       | 3  | 20 | 22.2  | 6.1  | 62.2  | 46 | 6.8   | 0.8   | 15.2  | <b>0.0033</b>    |
|                                                                       | 6  | 14 | 27.6  | 9.4  | 59.6  | 36 | 12.6  | 3.1   | 32.4  | 0.09             |
|                                                                       | 9  | 14 | 41.6  | 15.7 | 55.6  | 24 | 15.3  | 6.1   | 52.7  | 0.09             |

|                        |    |    |       |       |       |    |       |       |       |                  |
|------------------------|----|----|-------|-------|-------|----|-------|-------|-------|------------------|
|                        | 12 | 12 | 25.3  | 8.4   | 97.9  | 25 | 18.6  | 9.1   | 40.7  | 0.53             |
|                        | 18 | 10 | 24.8  | 14.7  | 75.3  | 18 | 25.5  | 6.8   | 105.2 | 0.90             |
|                        | 24 | 7  | 10.7  | 2.8   | 19.7  | 17 | 26.2  | 8.4   | 71.1  | 0.16             |
| <b>Treg:Tcon ratio</b> | 1  | 21 | 0.064 | 0.043 | 0.088 | 37 | 0.179 | 0.089 | 0.342 | <b>0.0001</b>    |
|                        | 2  | 26 | 0.059 | 0.043 | 0.087 | 51 | 0.099 | 0.056 | 0.155 | <b>0.03</b>      |
|                        | 3  | 20 | 0.058 | 0.052 | 0.091 | 45 | 0.12  | 0.083 | 0.178 | <b>0.0005</b>    |
|                        | 6  | 14 | 0.081 | 0.035 | 0.125 | 36 | 0.093 | 0.067 | 0.135 | 0.42             |
|                        | 9  | 14 | 0.078 | 0.038 | 0.134 | 24 | 0.092 | 0.062 | 0.14  | 0.52             |
|                        | 12 | 12 | 0.068 | 0.035 | 0.134 | 25 | 0.076 | 0.055 | 0.096 | 0.60             |
|                        | 18 | 10 | 0.052 | 0.031 | 0.076 | 18 | 0.082 | 0.056 | 0.105 | 0.12             |
|                        | 24 | 7  | 0.07  | 0.022 | 0.1   | 17 | 0.064 | 0.05  | 0.098 | 0.66             |
| <b>CD4:CD8 ratio</b>   | 1  | 21 | 2.579 | 1.687 | 2.863 | 37 | 0.671 | 0.362 | 1.549 | <b>&lt;.0001</b> |
|                        | 2  | 26 | 1.741 | 0.6   | 2.335 | 51 | 1.148 | 0.351 | 2.901 | 0.51             |
|                        | 3  | 20 | 1.532 | 0.893 | 1.988 | 46 | 1.148 | 0.644 | 2.984 | 0.99             |
|                        | 6  | 14 | 1.3   | 0.845 | 1.66  | 36 | 0.837 | 0.36  | 2.027 | 0.16             |
|                        | 9  | 14 | 1.191 | 0.634 | 2.391 | 24 | 0.792 | 0.334 | 1.823 | 0.17             |
|                        | 12 | 12 | 1.094 | 0.635 | 2.338 | 25 | 0.806 | 0.392 | 1.806 | 0.25             |
|                        | 18 | 10 | 0.941 | 0.465 | 1.331 | 18 | 1.127 | 0.506 | 1.444 | 0.90             |
|                        | 24 | 7  | 0.931 | 0.698 | 2.95  | 17 | 0.92  | 0.57  | 1.485 | 0.37             |

**Table S8.** The median absolute values along with the corresponding inter-quartile values and p-values referring to Figures 2A, 2B, 2C.

|                                             | Months | MD |        |      |       | Haplo |        |      |       | p-value       |
|---------------------------------------------|--------|----|--------|------|-------|-------|--------|------|-------|---------------|
|                                             |        | N  | Median | Q1   | Q3    | N     | Median | Q1   | Q3    |               |
| NK CD56 <sup>bright</sup> CD16 <sup>-</sup> | 1      | 20 | 9.6    | 4    | 21.8  | 36    | 7.7    | 2.4  | 41.3  | 0.91          |
|                                             | 2      | 26 | 12.7   | 3.1  | 28.4  | 52    | 23.4   | 11.7 | 57.9  | <b>0.0081</b> |
|                                             | 3      | 20 | 10.9   | 3.9  | 22.1  | 49    | 17.5   | 11   | 49.4  | <b>0.0048</b> |
|                                             | 6      | 13 | 8.6    | 2.4  | 11.7  | 41    | 24.9   | 12.3 | 47.2  | <b>0.0017</b> |
|                                             | 9      | 14 | 7.6    | 5    | 17.4  | 28    | 12.8   | 5.3  | 33.9  | 0.21          |
|                                             | 12     | 11 | 6      | 3.6  | 13.4  | 26    | 13     | 5.6  | 21.9  | 0.25          |
|                                             | 18     | 10 | 5.8    | 3    | 7.4   | 20    | 10.6   | 5.8  | 17.3  | 0.19          |
|                                             | 24     | 7  | 3.7    | 2    | 9.1   | 20    | 9.6    | 5.8  | 13.1  | 0.06          |
| NK CD56 <sup>dim</sup> CD16 <sup>+</sup>    | 1      | 20 | 92.1   | 53.2 | 159   | 36    | 16.3   | 4.7  | 49.2  | <b>0.0006</b> |
|                                             | 2      | 26 | 132.7  | 76.6 | 185.1 | 52    | 75.7   | 34.8 | 134.6 | <b>0.0091</b> |
|                                             | 3      | 20 | 163.3  | 69.6 | 217.1 | 49    | 81.6   | 47.3 | 118.8 | <b>0.011</b>  |
|                                             | 6      | 13 | 96.7   | 56.9 | 133.1 | 41    | 108.6  | 56.7 | 162   | 0.61          |
|                                             | 9      | 14 | 100.6  | 66   | 190.2 | 28    | 122.9  | 48.4 | 154   | 0.88          |
|                                             | 12     | 11 | 97.2   | 45.9 | 151.7 | 26    | 92.9   | 49.6 | 182.4 | 0.56          |
|                                             | 18     | 10 | 117.9  | 47.4 | 158.7 | 20    | 127.1  | 82.9 | 258.9 | 0.55          |
|                                             | 24     | 7  | 172.1  | 76.2 | 284.5 | 20    | 111.9  | 64.2 | 206.7 | 0.31          |
| NK CD56 <sup>dim</sup> CD16 <sup>-</sup>    | 1      | 20 | 13.9   | 6.6  | 19.9  | 36    | 12.7   | 3.2  | 26.1  | 0.73          |
|                                             | 2      | 26 | 13.3   | 4.6  | 23.4  | 52    | 15.4   | 9.3  | 25.8  | 0.39          |
|                                             | 3      | 20 | 9.3    | 4.5  | 14.6  | 49    | 10.1   | 5.9  | 16    | 0.51          |
|                                             | 6      | 13 | 6.4    | 3.9  | 14.9  | 41    | 11.5   | 7.1  | 21.5  | <b>0.04</b>   |
|                                             | 9      | 14 | 9.1    | 7    | 15.6  | 28    | 11.7   | 5.8  | 24.2  | 0.62          |
|                                             | 12     | 11 | 7.2    | 6.6  | 14.4  | 26    | 10.7   | 7.5  | 19    | 0.50          |
|                                             | 18     | 10 | 9.3    | 8.1  | 10.9  | 20    | 12.9   | 5.6  | 20.4  | 0.37          |
|                                             | 24     | 7  | 6.5    | 5.7  | 17.7  | 20    | 8.5    | 4.6  | 20.2  | 0.80          |
| NK CD56 <sup>bright</sup> CD16 <sup>+</sup> | 1      | 20 | 5.6    | 1.3  | 10.6  | 36    | 3.4    | 0.8  | 12.9  | 0.30          |
|                                             | 2      | 26 | 8.2    | 2.6  | 17.2  | 52    | 9.5    | 3.2  | 21.1  | 0.42          |
|                                             | 3      | 20 | 7.3    | 2    | 14.9  | 49    | 13.3   | 7.9  | 27.8  | <b>0.0035</b> |
|                                             | 6      | 13 | 6.6    | 3.9  | 8.6   | 41    | 12.5   | 7.1  | 16.6  | <b>0.024</b>  |

|                                                                                                        |    |    |       |       |       |    |       |       |       |                  |
|--------------------------------------------------------------------------------------------------------|----|----|-------|-------|-------|----|-------|-------|-------|------------------|
|                                                                                                        | 9  | 14 | 5.8   | 3     | 10.7  | 28 | 8.6   | 2.6   | 13.8  | 0.57             |
|                                                                                                        | 12 | 11 | 4.1   | 3     | 9.2   | 26 | 5.1   | 2.8   | 12.7  | 0.50             |
|                                                                                                        | 18 | 10 | 5     | 3.8   | 5.7   | 20 | 5.2   | 3     | 11.7  | 0.71             |
|                                                                                                        | 24 | 7  | 4.6   | 2     | 5.7   | 20 | 5.7   | 3.2   | 9.3   | 0.16             |
| <b>NK CD56<sup>bright</sup> CD16<sup>-</sup>:<br/>NK CD56<sup>dim</sup> CD16<sup>+</sup><br/>ratio</b> | 1  | 21 | 0.151 | 0.085 | 0.228 | 36 | 0.443 | 0.136 | 1.961 | <b>0.0014</b>    |
|                                                                                                        | 2  | 27 | 0.092 | 0.031 | 0.181 | 52 | 0.323 | 0.101 | 0.918 | <b>0.0003</b>    |
|                                                                                                        | 3  | 21 | 0.061 | 0.026 | 0.208 | 49 | 0.246 | 0.129 | 0.661 | <b>&lt;.0001</b> |
|                                                                                                        | 6  | 13 | 0.096 | 0.033 | 0.152 | 41 | 0.263 | 0.106 | 0.552 | <b>0.013</b>     |
|                                                                                                        | 9  | 14 | 0.067 | 0.037 | 0.147 | 28 | 0.171 | 0.033 | 0.36  | 0.24             |
|                                                                                                        | 12 | 12 | 0.125 | 0.043 | 0.218 | 26 | 0.147 | 0.04  | 0.29  | 0.66             |
|                                                                                                        | 18 | 11 | 0.098 | 0.02  | 0.161 | 20 | 0.069 | 0.024 | 0.194 | 0.69             |
|                                                                                                        | 24 | 8  | 0.036 | 0.016 | 0.055 | 20 | 0.074 | 0.043 | 0.202 | 0.06             |

**Table S9.** The median absolute values along with the corresponding inter-quartile values and p-values referring to Figures 3C and 3D.

|                                            | Months | No CMV |        |      |      | CMV |        |      |       | p-value       |
|--------------------------------------------|--------|--------|--------|------|------|-----|--------|------|-------|---------------|
|                                            |        | N      | Median | Q1   | Q3   | N   | Median | Q1   | Q3    |               |
| <b>NK CD16:<br/>CD16<sup>+</sup> ratio</b> | 1      | 26     | 0.83   | 0.47 | 1.79 | 10  | 2.49   | 1.23 | 12.68 | <b>0.0085</b> |
|                                            | 2      | 35     | 0.4    | 0.22 | 0.86 | 17  | 0.93   | 0.45 | 1.73  | <b>0.019</b>  |
|                                            | 3      | 35     | 0.35   | 0.24 | 0.66 | 14  | 0.42   | 0.27 | 0.66  | 0.52          |
|                                            | 6      | 27     | 0.31   | 0.13 | 0.53 | 14  | 0.28   | 0.2  | 1.03  | 0.48          |
|                                            | 9      | 17     | 0.24   | 0.07 | 0.32 | 11  | 0.28   | 0.16 | 1.57  | 0.3           |
|                                            | 12     | 15     | 0.28   | 0.14 | 0.36 | 11  | 0.21   | 0.08 | 0.71  | 0.76          |

**Table S10.** The median absolute values along with the corresponding inter-quartile values and p-values referring to Figure 6B.

|                                            | Months | No cGVHD |        |       |       | cGVHD |        |       |       | p-value      |
|--------------------------------------------|--------|----------|--------|-------|-------|-------|--------|-------|-------|--------------|
|                                            |        | N        | Median | Q1    | Q3    | N     | Median | Q1    | Q3    |              |
| <b>NK CD16:<br/>CD16<sup>+</sup> ratio</b> | 1      | 28       | 0.89   | 0.513 | 1.882 | 8     | 2.959  | 1.046 | 12.34 | <b>0.04</b>  |
|                                            | 2      | 42       | 0.421  | 0.241 | 0.855 | 10    | 1.529  | 1.198 | 2.728 | <b>0.001</b> |
|                                            | 3      | 40       | 0.34   | 0.232 | 0.645 | 9     | 0.571  | 0.364 | 0.912 | 0.16         |
|                                            | 6      | 31       | 0.287  | 0.148 | 0.523 | 10    | 0.828  | 0.218 | 8.355 | <b>0.04</b>  |
|                                            | 9      | 20       | 0.207  | 0.133 | 0.29  | 8     | 0.78   | 0.361 | 1.258 | 0.1          |
|                                            | 12     | 18       | 0.203  | 0.093 | 0.355 | 8     | 0.462  | 0.282 | 1.53  | 0.05         |

**Table S11.** The median absolute values along with the corresponding inter-quartile values and p-values referring to Figure 6D.

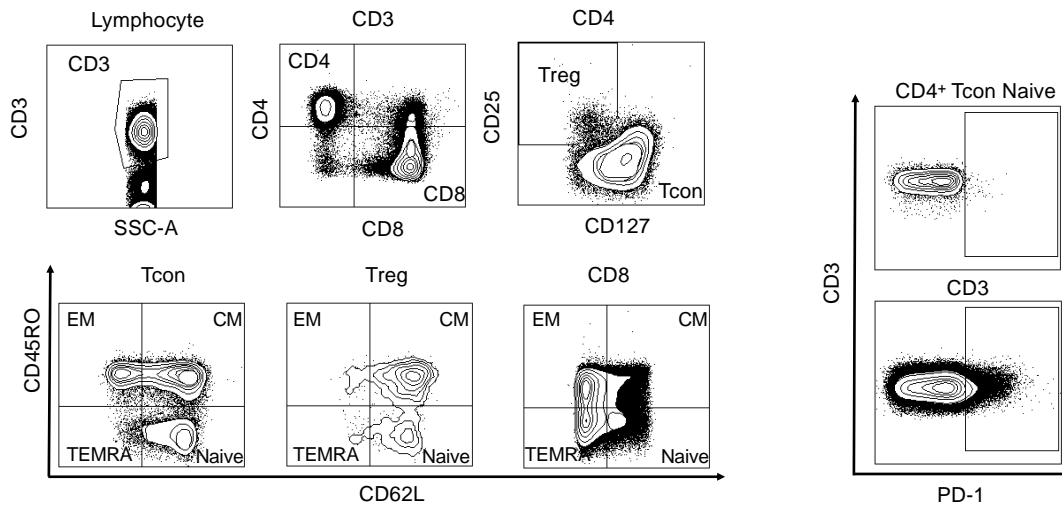

**Figure S1. Gating strategy for T cell subset analysis.** Three major T cell populations, CD4Treg, CD4Tcon, and CD8 T cells, were defined as  $CD3^+CD4^+CD8^-CD25^+CD127^-$ ,  $CD3^+CD4^+CD8^-$  non-Treg cells and  $CD3^+CD4^-CD8^+$ , respectively. Within each T cell population, subsets were defined as follows: naïve ( $CD45RO^-CD62L^+$ ), central memory (CM,  $CD45RO^+CD62L^+$ ), effector memory (EM,  $CD45RO^+CD62L^-$ ), and terminally differentiated effector memory (TEMRA,  $CD45RO^-CD62L^-$ ) T cells. PD-1 expression was monitored on each T cell subset.<sup>6,7</sup>



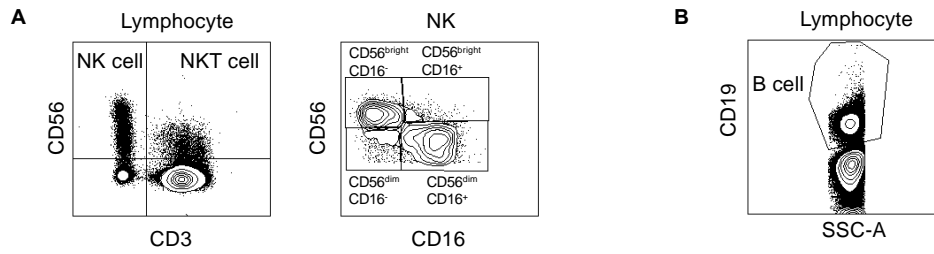

**Figure S2: Gating strategy for analyzing NK and B cells:** A) NK cells were defined as CD45<sup>+</sup>CD3<sup>+</sup>CD56<sup>+</sup> lymphocytes and divided in 4 subsets based on the expression of CD56 and CD16: CD56<sup>bright</sup>CD16<sup>-</sup>, CD56<sup>dim</sup>CD16<sup>+</sup>, CD56<sup>dim</sup>CD16<sup>-</sup> and CD56<sup>bright</sup>CD16<sup>+</sup> NK cells. NKT cells were defined as CD45<sup>+</sup>CD3<sup>+</sup>CD56<sup>+</sup> lymphocytes. B) B cells were defined as CD45<sup>+</sup>CD19<sup>+</sup> lymphocytes.

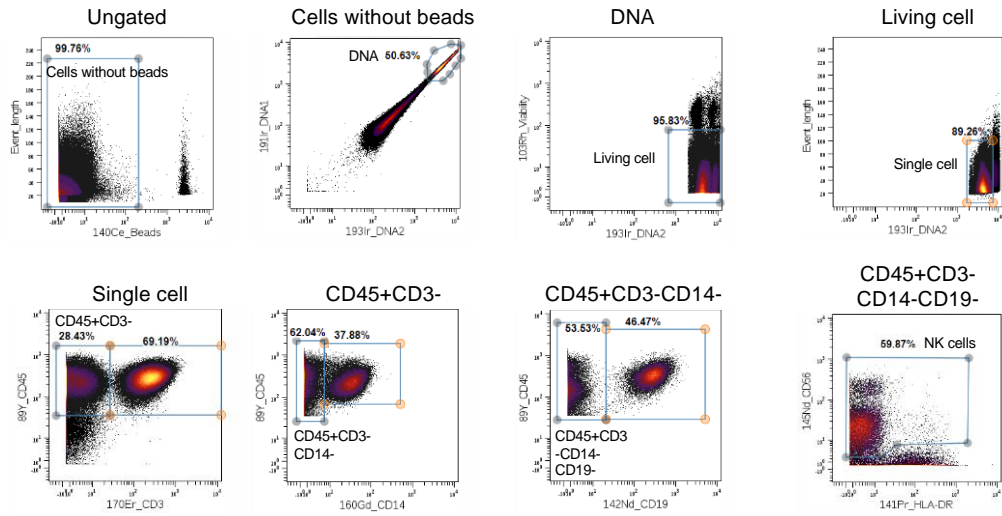

**Figure S3.** Mass cytometry NK cell gating strategy.

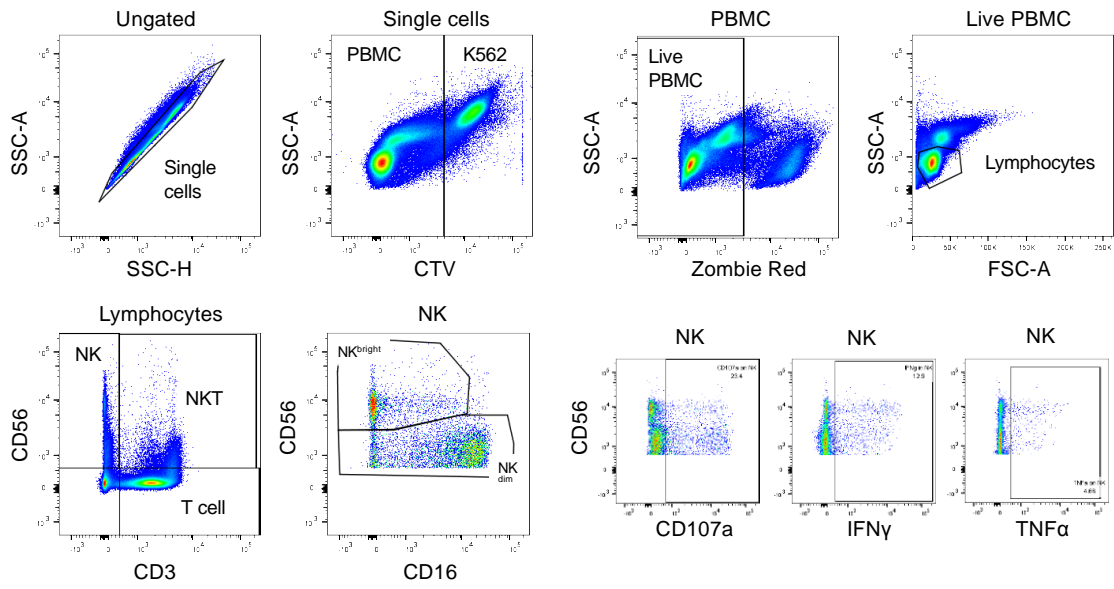

**Figure S4.** Flow cytometry NK cell gating strategy for functional assays.

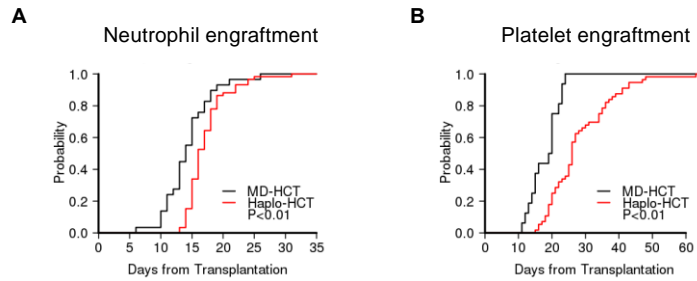

**Figure S5.** Engraftment after HCT. **A)** Probability of neutrophil engraftment. **B)** Probability platelet engraftment. Values are plotted for haploidentical cohort (haplo-HCT n=60, red line) and matched donor cohort (MD-HCT n=35, black line).

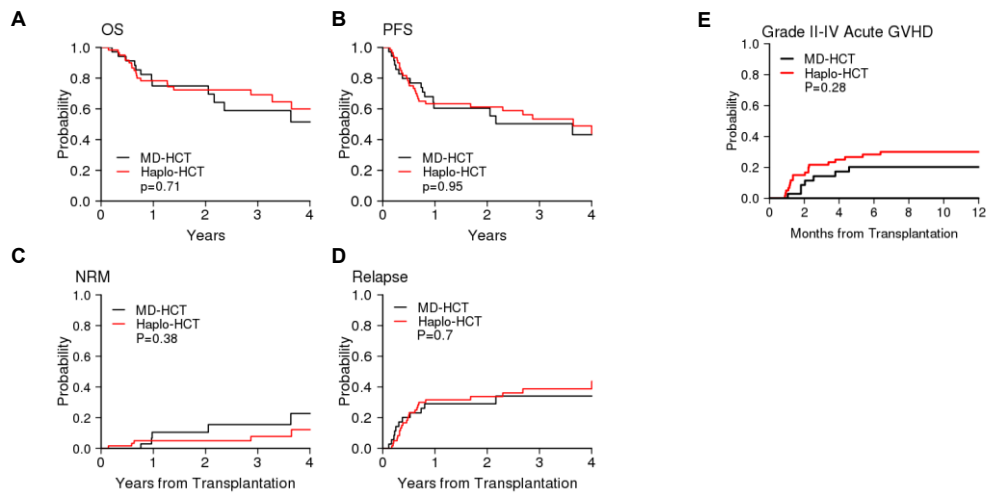

**Figure S6. Clinical outcomes in haplo-HCT and MD-HCT cohorts.** **A)** Probability of overall survival (OS). **B)** Probability of progression free survival (PFS). **C)** Probability of non-relapse mortality (NRM). **D)** Probability of relapse. **E)** Probability of acute graft versus host disease (aGVHD). Values are plotted for haploidentical cohort (haplo-HCT n=60, red line) and matched donor cohort (MD-HCT n=35, black line).

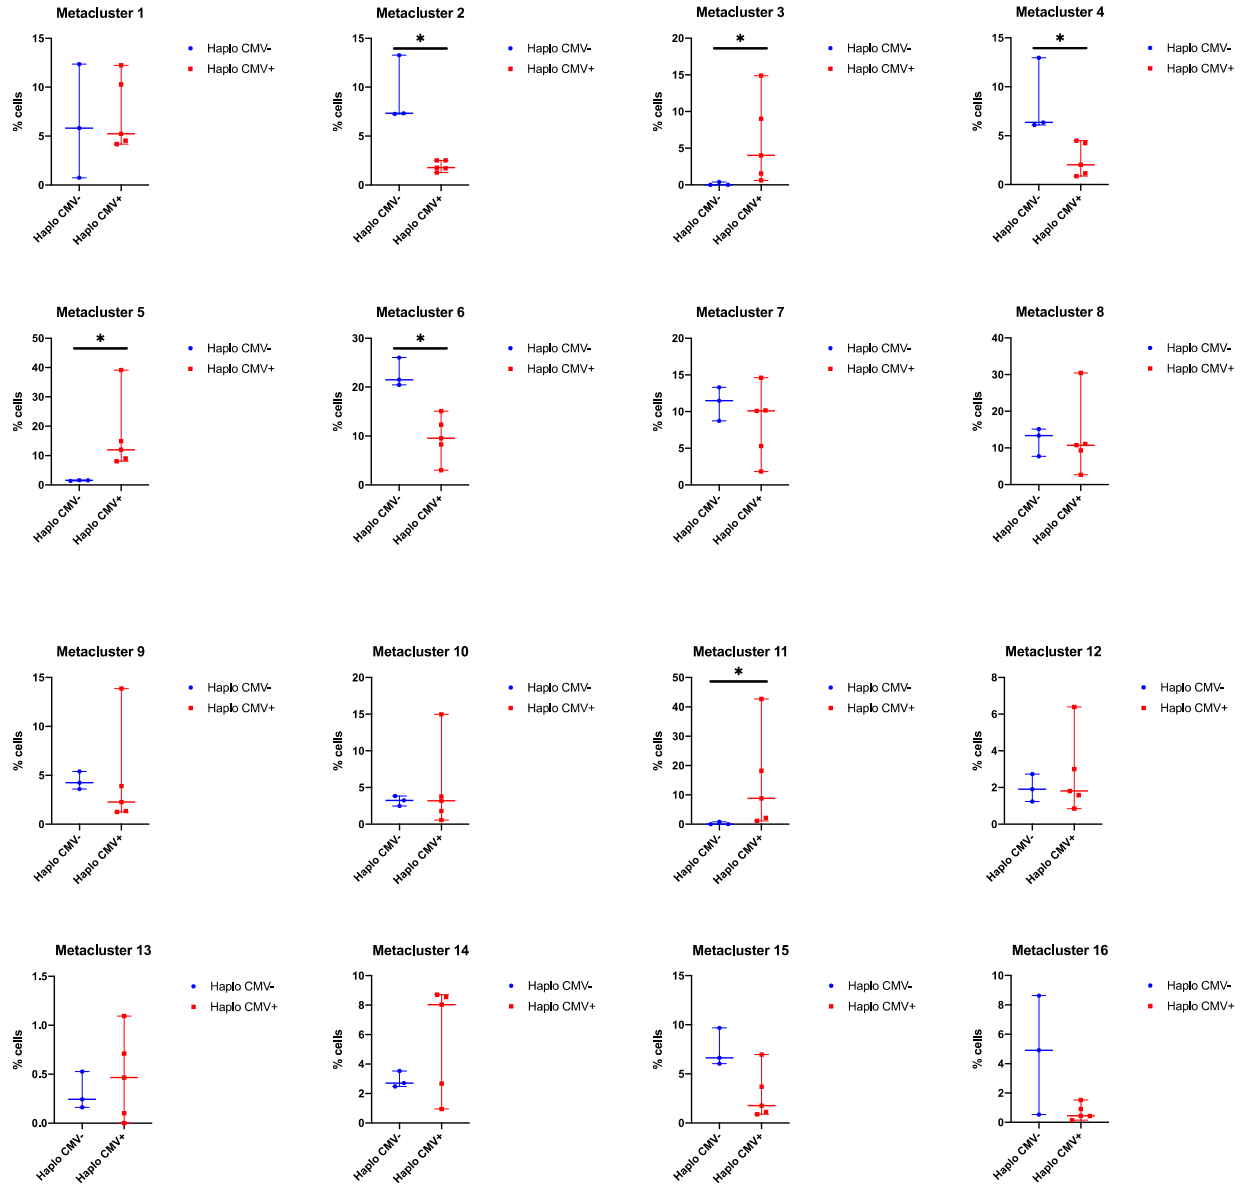

**Figure S7. NK cell meta-cluster distribution 3 months after haplo-HCT in patients with and without CMV reactivation.** A) Representation of FlowSOM meta-clusters in 8 haplo-HCT samples. B) viSNE density map of haplo-HCT patients with CMV reactivation (n=5) and without (n=3). C) Percentage distribution of FlowSOM NK cell meta-clusters in patients with CMV reactivation (n=5) compared to patients without (n=3). Data are expressed as median and range and compared using Wilcoxon signed-rank test for comparison, \* P < 0.05.

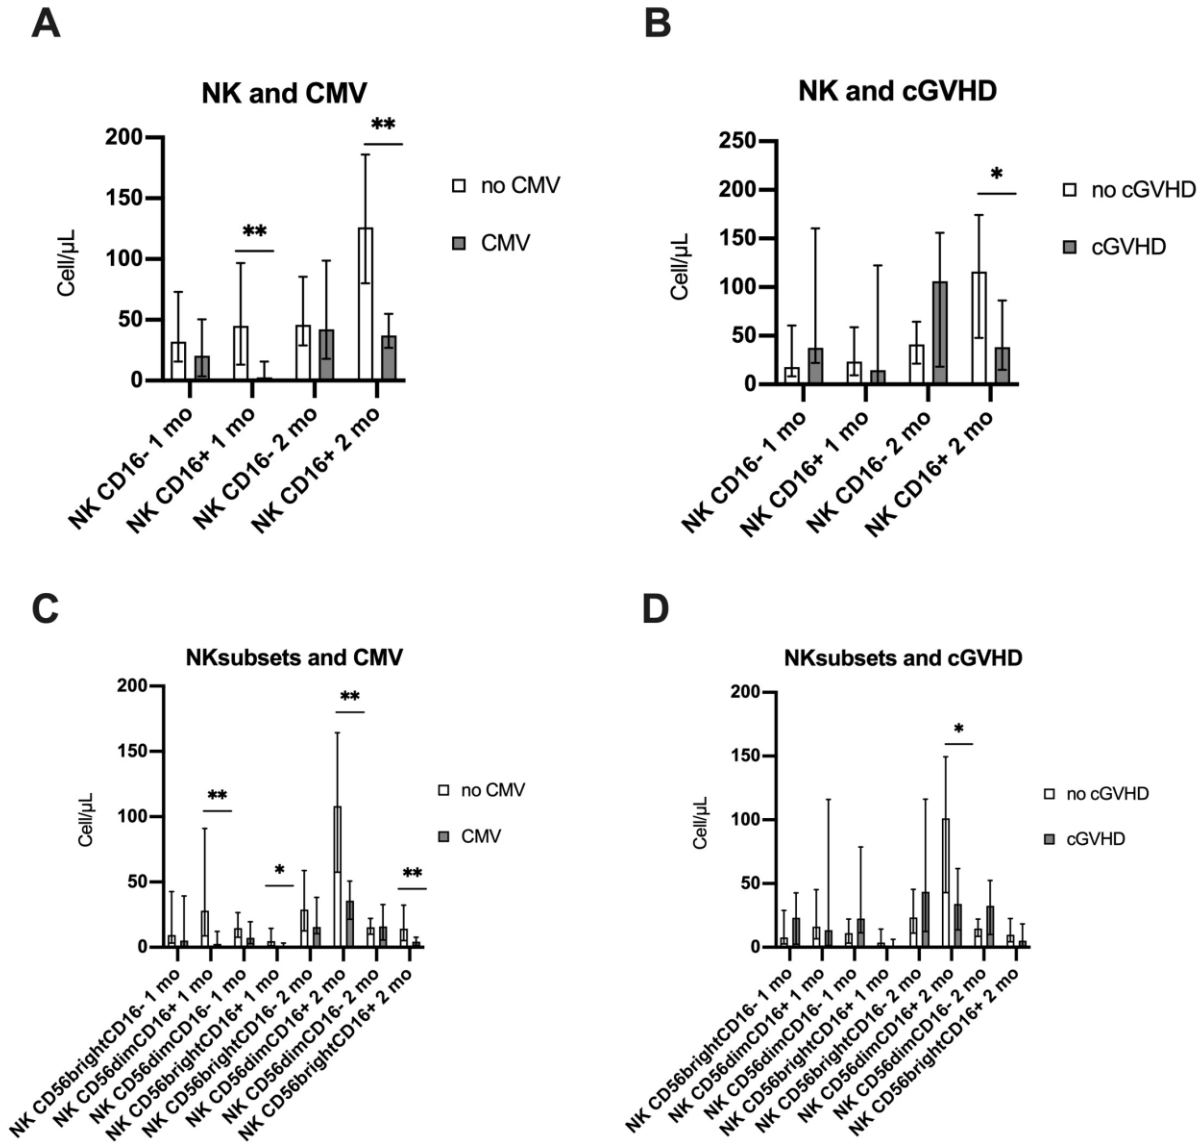

**Figure S8. Absolute numbers of peripheral blood CD16<sup>+</sup> and CD16<sup>-</sup> NK cells and NK cell subsets (CD56<sup>bright</sup>CD16<sup>-</sup>, CD56<sup>dim</sup>CD16<sup>+</sup>, CD56<sup>bright</sup>CD16<sup>+</sup> and CD56<sup>dim</sup>CD16<sup>-</sup>) 1 and 2 months after haplo-HCT. A and C: Comparison of patients with and without CMV reactivation. B and D: Comparison of patients who later developed or did not develop cGVHD. Box and whisker plots show medians, along with minimum and maximum values. Groups were compared using Wilcoxon signed-rank test for paired comparison, \* P< 0.05 and \*\* P< 0.01.**
